# Supplementary material
Source: publisher site journal article supplement (https://www.dovepress.com/get_supplementary_file.php?f=488000.docx)

Directory：

Table S1 Baseline characteristics of patients with or without H-type hypertension after propensity score matching

Table S2 Baseline characteristics of patients with or without H-type hypertension after IPTW

Figure S1. Flow of patients in the study of H-type hypertension versus non-H-type hypertension

Table S1 Baseline characteristics of patients with or without H-type hypertension after propensity score matching

| **Baseline Characteristic** | All | non-H (n=43) | H-type hypertension (n=84) | *P* Value |
| --- | --- | --- | --- | --- |
| **Age, median (IQR), y** | 71 (63,77) | 68 (64,76) | 72 (63,77) | 0.37 |
| **Sex, No (%)** |  |  |  |  |
| Female | 77 (60.6) | 27 (62.8) | 50 (59.5) | 0.72 |
| Male | 50 (39.4) | 16 (37.2) | 34 (40.5) |
| **Medical history No. (%)** |  |  |  |  |
| Diabetes | 40 (31.5) | 11(25.6) | 29(34.5) | 0.31 |
| Cerebral infarction | 30 (23.6) | 12 (27.9) | 18(21.4) | 0.42 |
| Atrial fibrillation | 43 (33.9) | 15 (34.9) | 28 (33.3) | 0.86 |
| Hyperlipidemia | 23 (18.1) | 6 (14) | 17(20.2) | 0.38 |
| Smoking | 23 (18.1) | 8 (18.6) | 15(17.9) | 0.92 |
| **Prestroke antithrombotic therapy – n (%)** |  |  |  |  |
| Oral anticoagulant | 16 (12.6) | 5 (11.6) | 11 (13.1) | 0.81 |
| Mono-antiplatelet therapy | 10 (7.9) | 5 (11.6) | 5 (6.0) | 0.26 |
| **Stroke etiology – no. (%)** |  |  |  |  |
| Large artery atherosclerosis | 62 (48.8) | 21 (48.8) | 41 (48.8) | >0.99 |
| Cardioembolism | 50 (39.4) | 17 (39.5) | 33 (39.3) |
| Other | 15 (11.8) | 5 (11.6) | 10 (11.9) |
| **NIHSS score, median (IQR)** | 17 (13,20) | 16 (12,20) | 17 (13,20) | 0.48 |
| **onset to puncture(minutes)(IQR)** | 308 (210,450) | 283 (210,510) | 311 (210,437) | 0.89 |
| **Imaging characteristics** |  |  |  |  |
| ASPECTS score, median (IQR) | 8 (7,9) | 8 (7,9) | 8 (7,9) | 0.66 |
| **Occlusion site – no. (%)** |  |  |  |  |
| Intracranial internal carotid artery | 25 (19.7) | 6 (14.0) | 19 (22.6) | 0.089 |
| M1 middle cerebral artery segment | 81 (63.8) | 33 (76.7) | 48 (57.1) |
| M2 middle cerebral artery segment | 21 (16.5) | 4 (9.3) | 17 (20.2) |
| **Tirofiban (%)** | 59 (46.5) | 17 (39.5) | 42 (50) | 0.26 |

Table S2 Baseline characteristics of patients with or without H-type hypertension after IPTW

| **Baseline Characteristic** | RT  (n=38.95) | No-RT  (n=172.96) | *P* |
| --- | --- | --- | --- |
| Age, median (IQR), y | 67.86 (9.90) | 67.74 (10.99) | 0.95 |
| **Sex, No (%)** |  |  |  |
| Female | 17.1 (45.7) | 73.2 (41.7) | 0.68 |
| Male | 20.3 (54.3) | 102.1 (58.3) |
| **Medical history No. (%)** |  |  |  |
| Diabetes | 12.1 (32.4) | 50.4 (28.8) | 0.70 |
| Cerebral infarction | 9.2 (24.7) | 37.9 (21.6) | 0.73 |
| Atrial fibrillation | 10.6 (28.3) | 51.2 (29.2) | 0.92 |
| Hyperlipidemia | 6.3 (16.9) | 25.3 (14.4) | 0.72 |
| Smoking | 11.4 (30.5) | 49.1 (28.0) | 0.80 |
| **Prestroke antithrombotic therapy No. (%)** |  |  |  |
| Oral anticoagulant | 1.8 (4.9) | 11.9 (6.8) | 0.63 |
| Mono-antiplatelet therapy | 4.1 (11.0) | 20.5 (11.7) | 0.903 |
| **Stroke etiology No. (%)** |  |  | 0.83 |
| Large artery atherosclerosis | 18.1 (48.4) | 98.1 (56.0) |
| Cardioembolism | 15.7 (41.9) | 59.5 (34.0) |
| Other | 3.6 (9.6) | 17.6 (10.1) |
| **NIHSS score, median (IQR)** | 14.88 (4.37) | 15.24 (5.22) | 0.69 |
| **onset to**  **puncture(minutes)(IQR)** | 369.33 (212.69) | 456.15 (316.86) | 0.06 |
| **Imaging characteristics** |  |  |  |
| ASPECTS score, median (IQR) | 7.60 (1.33) | 7.60 (1.64) | 0.98 |
| **Occlusion site – No. (%)** |  |  |  |
| Intracranial internal carotid artery | 6.9 (18.3) | 38.3 (21.8) | 0.87 |
| M1 middle cerebral artery segment | 24.6 (65.7) | 114.2 (65.2) |
| M2 middle cerebral artery segment | 6.0 (16.0) | 22.8 (13.0) |
| **Tirofiban (%)** | 94.7 (54.2) | 22.5 (60.2) | 0.54 |

Abbreviations: IPTW, Inverse Probability of Treatment Weighting; RT, H-type hypertension after IPTW; non-RT, non-H-type hypertension after IPTW. LAA, Large artery atherosclerosis; CE, Cardioembolism; NIHSS, National Institutes of Health Stroke Scale; ASPECTS, Alberta stroke program early CT score.

Figure S1. Flow of patients in the study of H-type hypertension versus non-H-type hypertension


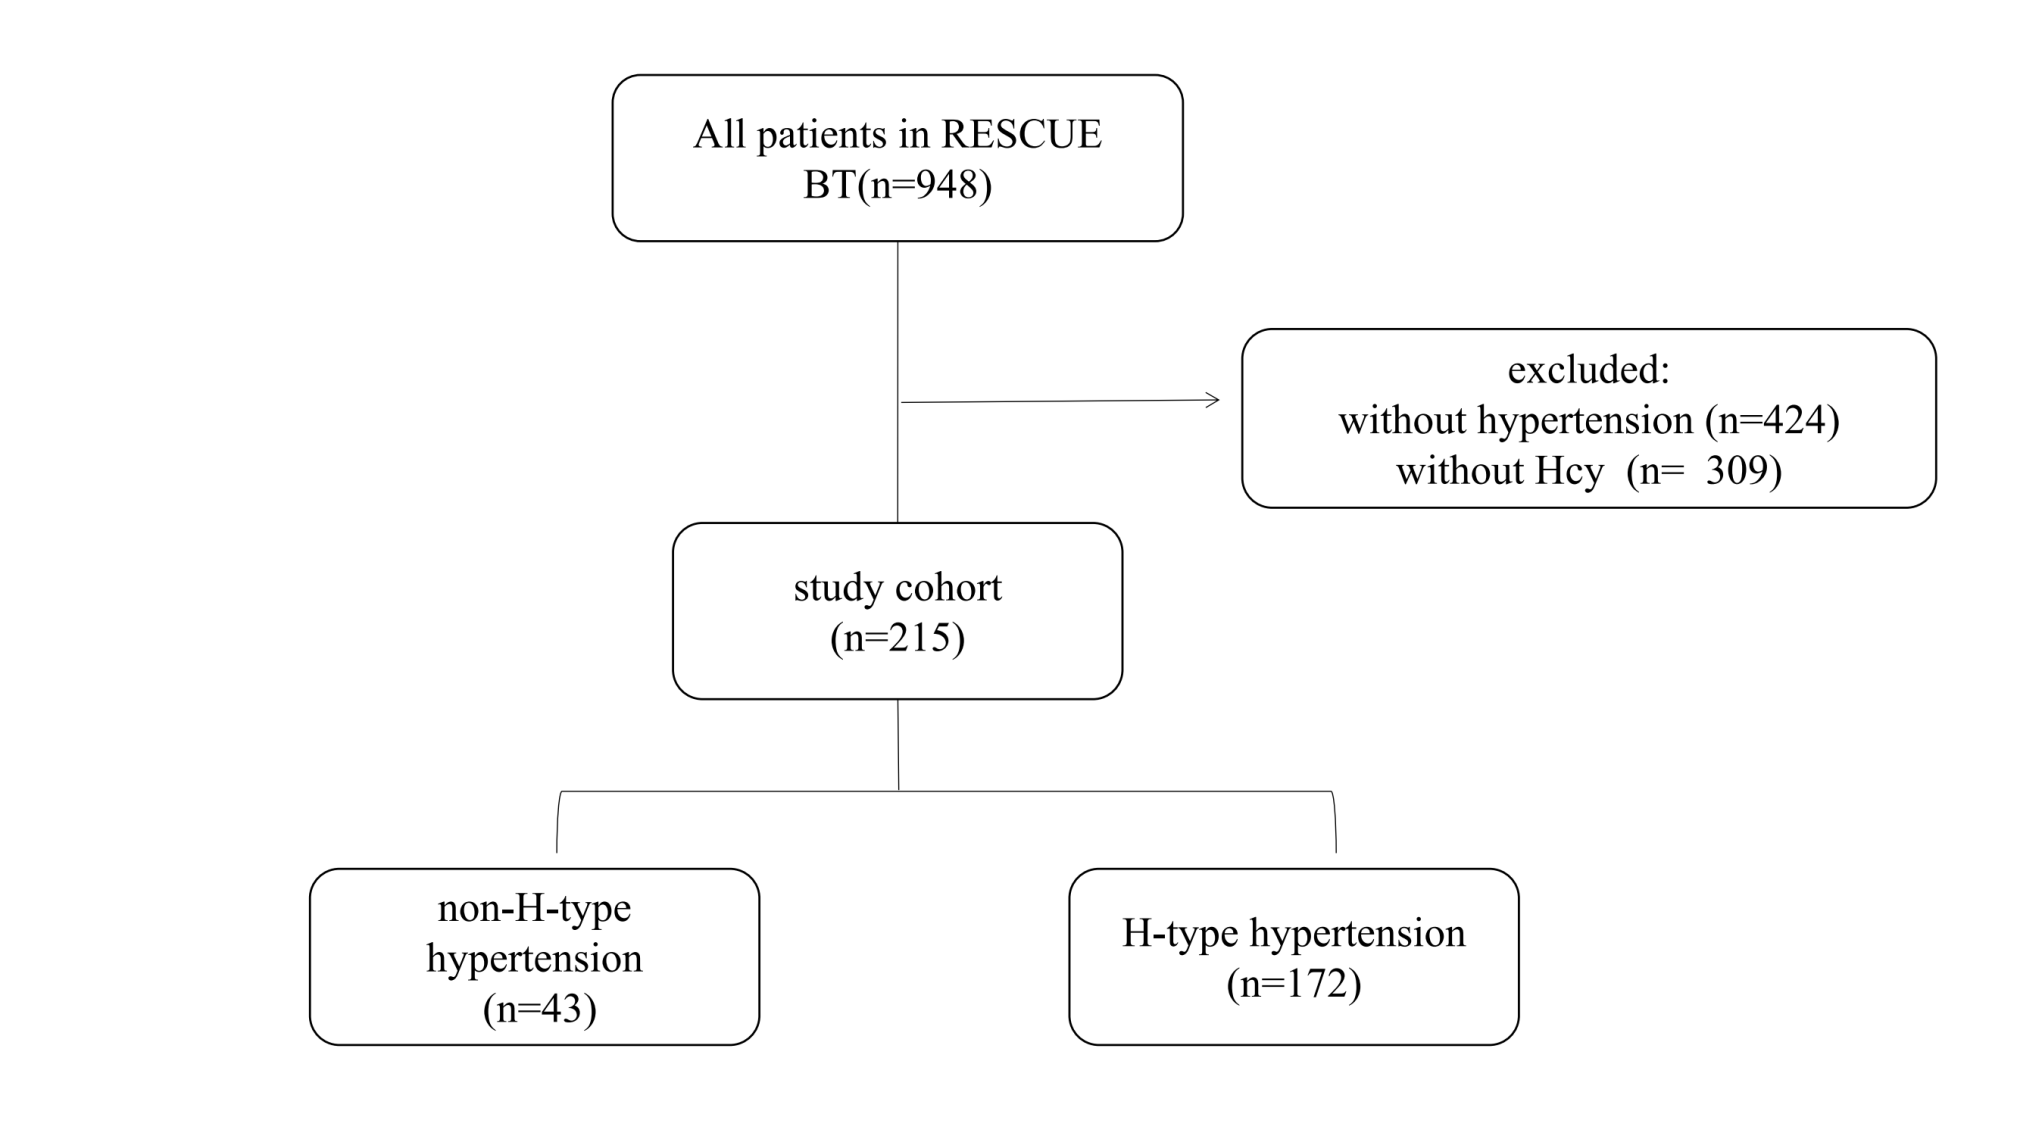

Supplement: Supplementary file 1 [file get_supplementary_file.php]
